# Supplementary material
Source: PubMed Central journal article supplement (PMC2852322)
Supplement: NIHMS185871-supplement-supplement.pdf [file NIHMS185871-supplement-supplement.pdf]

# A. SCOTS performed on in vitro-derived cDNA

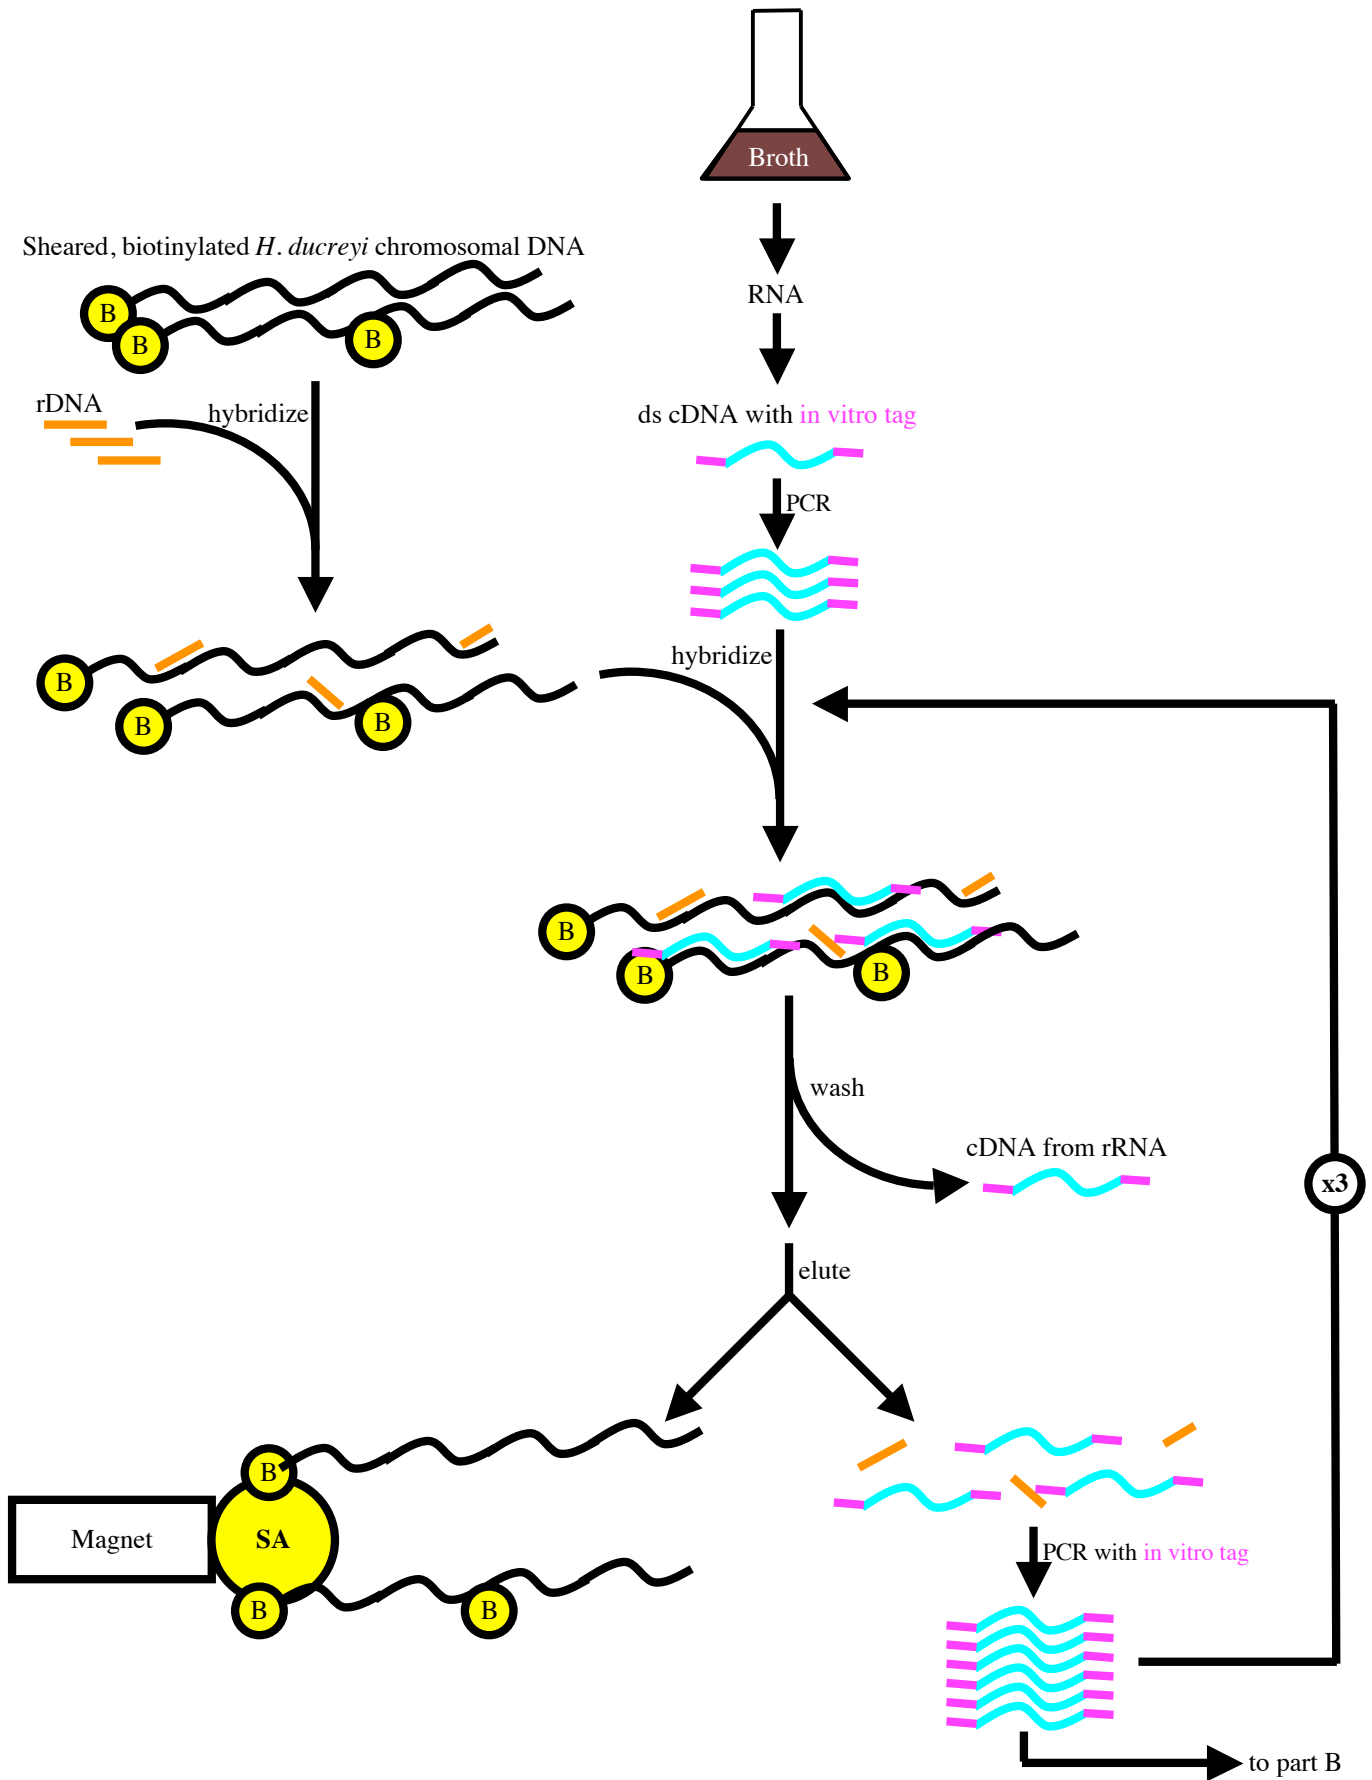

## B. Competitive SCOTS performed on in vivo-derived cDNA

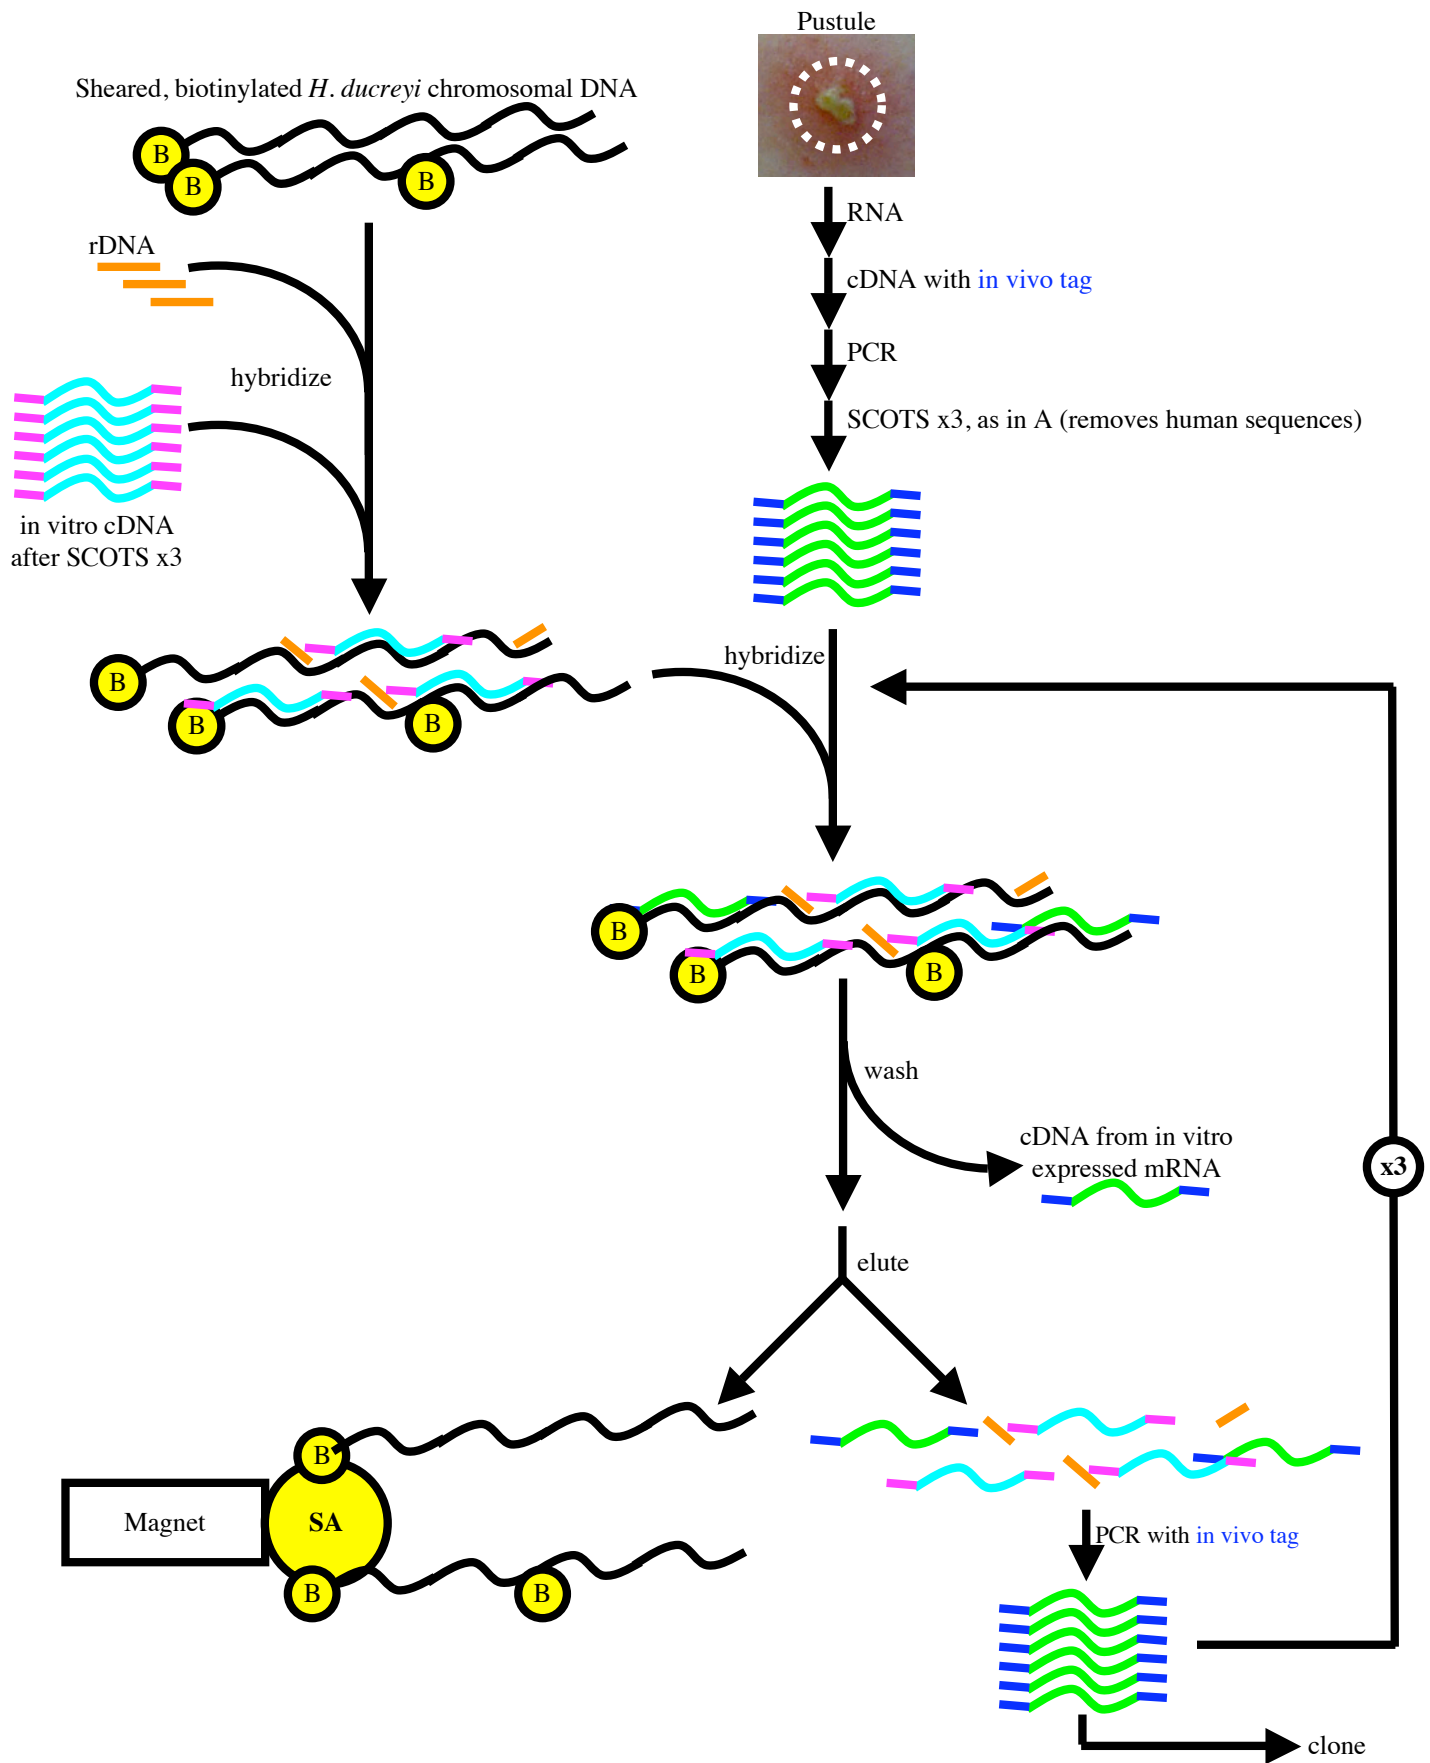

## Figure 1S Legend.

SCOTS Procedure. **(A)** Non-competitive SCOTS. Total RNA is isolated from broth-grown bacteria (shown) and converted to double-stranded cDNA (light blue) with an in vitro-specific tag (pink) for PCR amplification. The amplified cDNA is hybridized with sheared, biotinylated *H. ducreyi* chromosomal DNA (black) that has been prehybridized with rDNA (orange). cDNA representing genes transcribed in vitro bind to the biotinylated chromosomal DNA, while rRNA-derived sequences are blocked from hybridization and washed off. Then, mRNA-derived cDNA is eluted and PCR-amplified, and the hybridization repeated a total of three times. **(B)** Competitive SCOTS. A pustule from the human model of *H. ducreyi* infection is excisionally biopsied (dashed white ring). Total RNA is isolated, converted to double-stranded cDNA (green) with in vivo-specific tag (dark blue) for PCR amplification. The cDNA is subjected to 3 rounds of non-competitive SCOTS as described in (A) to remove human and rRNA derived sequences. After the final PCR amplification, in vivo-derived cDNA is hybridized to sheared, biotinylated *H. ducreyi* chromosomal DNA that has been pre-hybridized with rDNA and in vitro derived cDNA from (A). The in vitro derived cDNA hybridizes to genes transcribed in vitro, and only genes transcribed in vivo are available for subsequent hybridization. After washing to remove nonhybridized cDNA, all hybridized cDNA is eluted and PCR amplified with the in vivo specific tag to preferentially amplify in vivo transcribed sequences. The PCR amplified cDNA is then subjected to two additional rounds of hybridization, after which the final cDNA pool is cloned for sequencing. See section 4 for details.

1 Table S1. Tissue Samples Used in This Study

2

| Subject # | Gender <sup>a</sup> | # Days Infected | Tissue Used for: | Reference                        |
|-----------|---------------------|-----------------|------------------|----------------------------------|
| 238       | F                   | 6               | SCOTS            | (Janowicz <i>et al.</i> , 2004)  |
| 240       | F                   | 6               | SCOTS            | (Janowicz <i>et al.</i> , 2004)  |
| 250       | F                   | 7               | SCOTS            | (Fulcher <i>et al.</i> , 2006)   |
| 142       | M                   | 7               | RT-PCR           | (Throm & Spinola, 2001)          |
| 160       | M                   | 6               | RT-PCR           | (Bong <i>et al.</i> , 2001)      |
| 164       | M                   | 7               | RT-PCR           | (Throm & Spinola, 2001)          |
| 231       | M                   | 6               | RT-PCR           | (Humphreys <i>et al.</i> , 2005) |
| 232       | M                   | 6               | RT-PCR           | (Humphreys <i>et al.</i> , 2005) |
| 249       | M                   | 8               | RT-PCR           | (Fulcher <i>et al.</i> , 2006)   |
| 252       | F                   | 9               | RT-PCR           | (Fulcher <i>et al.</i> , 2006)   |
| 276       | M                   | 6               | RT-PCR           | (Janowicz <i>et al.</i> , 2006a) |
| 281       | F                   | 6               | RT-PCR           | (Janowicz <i>et al.</i> , 2006a) |

3

4 <sup>a</sup> F, female; M, male.

5

8

## Supplementary Data Table S2

| Functional Category            | Gene ID       | Gene Name or Homolog                                                          | Putative Function                                                                           |
|--------------------------------|---------------|-------------------------------------------------------------------------------|---------------------------------------------------------------------------------------------|
| Adherence-related              | HD1304        | <i>tadA</i> , tight adherence protein A                                       | possible adhesin or involved in type IV secretion                                           |
| Adherence-related              | HD1895        | putative adhesin processing HmwC-like protein                                 |                                                                                             |
| Bacteriophage Genes            | HD0527        | possible tail length tape measure protein                                     | morphogenesis, determines tail length                                                       |
| Bacteriophage Genes            | HD0518        | <i>gpI</i> , bacteriophage Mu I protein GP32                                  | protease involved in virion morphogenesis                                                   |
| Bacteriophage Genes            | HD0121        | Mu-like phage gp27                                                            |                                                                                             |
| Bacteriophage Genes            | HD0124        | Mu-like phage gp29                                                            |                                                                                             |
| Bacteriophage Genes            | HD0132        | possible Mu-like phage protein                                                |                                                                                             |
| Bacteriophage Genes            | HD0143        | possible bacteriophage TM4 gp14 protein homolog                               |                                                                                             |
| Bacteriophage Genes            | HD0514        | possible Mu-like phage protein                                                |                                                                                             |
| Biosynthesis/Metabolism        | HD1852        | <i>nanE</i> , possible N-acetylmannosamine-6-P epimerase                      | A-acetylmannosamine, sialic acid utilization pathways                                       |
| Biosynthesis/Metabolism        | HD0566        | <i>argE</i> , acetylornithine deacetylase                                     | amino acid synthesis: arginine biosynthesis                                                 |
| Biosynthesis/Metabolism        | HD0890        | <i>argC</i> , N-acetyl-gamma-glutamyl-phosphate reductase                     | amino acid synthesis: arginine biosynthesis                                                 |
| <b>Biosynthesis/Metabolism</b> | <b>HD1384</b> | <b><i>argA</i>, amino-acid acetyltransferase</b>                              | <b>amino acid synthesis: arginine biosynthesis</b>                                          |
| <b>Biosynthesis/Metabolism</b> | <b>HD0233</b> | <b><i>carB</i>, carbamoyl-phosphate synthase, large subunit</b>               | <b>amino acid synthesis: arginine, pyrimidine biosynthesis</b>                              |
| Biosynthesis/Metabolism        | HD1383        | <i>aroA</i> , 3-phosphoshikimate 1-carboxyvinyltransferase                    | amino acid synthesis: aromatic a.a. biosynthesis                                            |
| Biosynthesis/Metabolism        | HD1709        | <i>glnE</i> , glutamate ammonia ligase adenyllyltransferase                   | amino acid synthesis: modification of glutamine synthetase, allosteric control of glutamine |
| Biosynthesis/Metabolism        | HD0372        | <i>ansB</i> , L-asparaginase II                                               | breaks down asparagine to aspartate, anaerobic induction in <i>E. coli</i>                  |
| <b>Biosynthesis/Metabolism</b> | <b>HD2020</b> | <b><i>mrDA</i>, penicillin binding protein 2</b>                              | <b>cell wall structure: peptidoglycan degradation</b>                                       |
| Biosynthesis/Metabolism        | HD0241        | <i>ftsI</i> , penicillin binding protein 3                                    | cell wall structure: peptidoglycan synthesis                                                |
| Biosynthesis/Metabolism        | HD0426        | <i>mrcA</i> , penicillin binding protein 1A                                   | cell wall structure: peptidoglycan synthesis                                                |
| <b>Biosynthesis/Metabolism</b> | <b>HD0823</b> | <b><i>murC</i>, UDP-N-acetylmuramate--alanine ligase</b>                      | <b>cell wall structure: peptidoglycan synthesis</b>                                         |
| Biosynthesis/Metabolism        | HD1275        | <i>mepA</i> , penicillin-insensitive murein endopeptidase A                   | cell wall structure: peptidoglycan synthesis                                                |
| Biosynthesis/Metabolism        | HD0729        | <i>dat</i> , diaminobutyrate--pyruvate aminotransferase                       | central intermediary metabolism: amine, polyamine, ectoine biosynthesis                     |
| Biosynthesis/Metabolism        | HD1845        | <i>nagA</i> , N-acetylglucosamine-6-phosphate deacetylase                     | central intermediary metabolism: N-acetylglucosamine utilization pathway                    |
| Biosynthesis/Metabolism        | HD1624        | <i>aceF</i> , dihydrolipoamide acetyltransferase                              | central intermediary metabolism: part of pyruvate dehydrogenase complex                     |
| <b>Biosynthesis/Metabolism</b> | <b>HD1082</b> | <b><i>iscS</i>, cysteine desulfurase</b>                                      | <b>cofactor biosynthesis: iron-sulfur cluster formation, removes sulfur from Cys</b>        |
| Biosynthesis/Metabolism        | HD0214        | <i>pdxH</i> , pyridoxamine-5'-phosphate oxidase                               | cofactor biosynthesis: pyridoxine (vitamin B6) production                                   |
| <b>Biosynthesis/Metabolism</b> | <b>HD1593</b> | <b><i>pdxS</i>, putative pyridoxine biosynthesis protein</b>                  | <b>cofactor biosynthesis: pyridoxine (vitamin B6) production</b>                            |
| Biosynthesis/Metabolism        | HD0333        | <i>trxB</i> , thioredoxin reductase                                           | cofactor biosynthesis: reduces thioredoxin, protection from oxidative stress                |
| Biosynthesis/Metabolism        | HD0273        | <i>ribF</i> , riboflavin biosynthesis protein                                 | cofactor biosynthesis: riboflavin biosynthesis                                              |
| Biosynthesis/Metabolism        | HD1806        | <i>thiI</i> , thiamine biosynthesis protein                                   | cofactor biosynthesis: thiamine biosynthesis                                                |
| Biosynthesis/Metabolism        | HD0705        | <i>ispB</i> , octaprenyl-diphosphate synthase                                 | cofactor biosynthesis: ubiquinone, menaquinone synthesis                                    |
| <b>Biosynthesis/Metabolism</b> | <b>HD1457</b> | <b><i>pta</i>, phosphate acetyltransferase</b>                                | <b>conversion of acetate to acetyl CoA</b>                                                  |
| Biosynthesis/Metabolism        | HD1842        | <i>wecC</i> , UDP-N-acetyl-D-mannosaminuronic acid dehydrogenase              | ECA biosynthesis                                                                            |
| Biosynthesis/Metabolism        | HD1844        | <i>wecA</i> , undecaprenyl-phosphate alpha-N-acetylglucosaminyltransferase    | ECA biosynthesis, O-Ag biosynthesis                                                         |
| Biosynthesis/Metabolism        | HD0707        | <i>fabD</i> , malonyl CoA-acyl carrier protein transacylase                   | fatty acid and phospholipid metabolism: fatty acid biosynthesis                             |
| <b>Biosynthesis/Metabolism</b> | <b>HD0634</b> | <b><i>accB</i>, biotin carboxyl carrier protein of acetyl-CoA carboxylase</b> | <b>fatty acid and phospholipid metabolism: long chain fatty acid biosynthesis</b>           |
| Biosynthesis/Metabolism        | HD0829        | <i>galE</i> , UDP-glucose-4-epimerase                                         | galactose metabolism: controls internal galactose concentration                             |
| Biosynthesis/Metabolism        | HD0465        | <i>pfkA</i> , phosphofructokinase                                             | glycolysis/gluconeogenesis: controls glycolysis                                             |
| Biosynthesis/Metabolism        | HD0990        | <i>pfkB</i> , formate acetyltransferase                                       | glycolysis/gluconeogenesis: nonoxidative glucose metabolism                                 |
| <b>Biosynthesis/Metabolism</b> | <b>HD1331</b> | <b><i>pckA</i>, phosphoenolpyruvate carboxykinase</b>                         | <b>glycolysis/gluconeogenesis: rate-limiting gluconeogenesis</b>                            |
| Biosynthesis/Metabolism        | HD0217        | <i>lpxK</i> , tetraacyldisaccharide 4' kinase                                 | LOS biosynthesis: Lipid A biosynthesis                                                      |
| Biosynthesis/Metabolism        | HD1101        | <i>kdkA</i> , 3-deoxy-D-mannooctulosonic acid kinase                          | LOS biosynthesis: LOS core biosynthesis                                                     |
| Biosynthesis/Metabolism        | HD1182        | <i>waaE</i> , ADP-heptose synthase                                            | LOS biosynthesis: LOS core biosynthesis                                                     |
| Biosynthesis/Metabolism        | HD1929        | <i>rpe</i> , D-ribulose-phosphate-3 epimerase                                 | pentose-phosphate pathway: xylulose synthesis                                               |
| Biosynthesis/Metabolism        | HD0548        | <i>purT</i> , phosphoribosylglycinamide formyltransferase 2                   | purine biosynthesis                                                                         |
| Biosynthesis/Metabolism        | HD1247        | <i>maeA</i> , malate oxidoreductase                                           | TCA cycle, catalyzes malate to pyruvate                                                     |
| Biosynthesis/Metabolism        | HD1243        | <i>citF</i> , citrate lyase alpha chain                                       | TCA cycle, citrate:acetyl ACP transferase                                                   |
| Biosynthesis/Metabolism        | HD1334        | <i>sucB</i> , dihydrolipoamide succinyltransferase                            | TCA cycle, component of 2-oxoglutarate dehydrogenase complex                                |
| Cell Division                  | HD1582        | <i>mukB</i> , cell division protein                                           | necessary for chromosome partitioning and cell cycle progression                            |
| Cell Division                  | HD0050        | <i>sufl</i> , cell division protein                                           | periplasmic protein involved in cell division                                               |
| Cell Division                  | HD1940        | <i>xerC</i> , tyrosine recombinase                                            | required for chromosome dimer segregation                                                   |
| DNA Replication/Repair         | HD1731        | <i>nrdA</i> , ribonucleoside-diphosphate reductase, alpha chain               | catalyzes dNTP synthesis from NTPs                                                          |
| DNA Replication/Repair         | HD0571        | <i>rep</i> , ATP-dependent DNA helicase                                       | DNA helicase involved in replication                                                        |

|                         |        |                                                                       |
|-------------------------|--------|-----------------------------------------------------------------------|
| DNA Replication/Repair  | HD0626 | <i>recD</i> , exodeoxyribonuclease V, alpha subunit                   |
| DNA Replication/Repair  | HD1066 | <i>ung</i> , uracil-DNA glycosylase                                   |
| DNA Replication/Repair  | HD0743 | <i>mutL</i> , DNA mismatch repair protein                             |
| DNA Replication/Repair  | HD1921 | <i>recG</i> , ATP-dependent DNA helicase                              |
| DNA Replication/Repair  | HD1121 | <i>radA</i> , DNA repair protein                                      |
| DNA Replication/Repair  | HD2024 | <i>mutS</i> , DNA mismatch repair protein                             |
| DNA Replication/Repair  | HD1076 | <i>recB</i> , exodeoxyribonuclease V, beta subunit                    |
| DNA Replication/Repair  | HD1286 | <i>uvrA</i> , excinuclease ABC subunit A                              |
| DNA Replication/Repair  | HD1590 | <i>deadD</i> , cold-shock DEAD box protein-A                          |
| DNA Replication/Repair  | HD0973 | <i>dnaB</i> , replicative DNA helicase                                |
| DNA Replication/Repair  | HD1276 | <i>topB2</i> , DNA topoisomerase III                                  |
| Electron Transport      | HD0008 | <i>atpA</i> , ATP synthase alpha chain                                |
| Electron Transport      | HD1393 | <i>torY</i> , cytochrome c-type protein                               |
| Electron Transport      | HD1158 | <i>glpB</i> , anaerobic glycerol-3-phosphate dehydrogenase, subunit B |
| Electron Transport      | HD0084 | <i>lldD</i> , L-lactate dehydrogenase                                 |
| Electron Transport      | HD0344 | <i>nrfA</i> , nitrite reductase, cytochrome c552                      |
| Electron Transport      | HD1160 | <i>glpC</i> , anaerobic glycerol-3-phosphate dehydrogenase, subunit C |
| Electron Transport      | HD0074 | <i>napA</i> , periplasmic nitrate reductase                           |
| Hypothetical            | HD0109 | hypothetical protein                                                  |
| Hypothetical            | HD0148 | conserved hypothetical protein                                        |
| Hypothetical            | HD0154 | conserved hypothetical protein                                        |
| Hypothetical            | HD0155 | hypothetical protein                                                  |
| Hypothetical            | HD0256 | conserved hypothetical protein                                        |
| Hypothetical            | HD0261 | conserved hypothetical protein                                        |
| Hypothetical            | HD0302 | conserved hypothetical protein                                        |
| Hypothetical            | HD0340 | conserved hypothetical protein                                        |
| Hypothetical            | HD0521 | conserved hypothetical protein                                        |
| Hypothetical            | HD0522 | hypothetical protein                                                  |
| Hypothetical            | HD0529 | hypothetical protein                                                  |
| Hypothetical            | HD0532 | conserved hypothetical protein                                        |
| Hypothetical            | HD0533 | hypothetical protein                                                  |
| Hypothetical            | HD0534 | hypothetical protein                                                  |
| Hypothetical            | HD0535 | hypothetical protein                                                  |
| Hypothetical            | HD0607 | conserved hypothetical protein                                        |
| Hypothetical            | HD0646 | conserved hypothetical protein                                        |
| Hypothetical            | HD0921 | conserved hypothetical protein, N-terminal truncated                  |
| Hypothetical            | HD0922 | conserved hypothetical protein                                        |
| Hypothetical            | HD0933 | conserved hypothetical protein                                        |
| Hypothetical            | HD0935 | conserved hypothetical protein                                        |
| Hypothetical            | HD0936 | conserved hypothetical protein                                        |
| Hypothetical            | HD0966 | hypothetical protein                                                  |
| Hypothetical            | HD1061 | conserved hypothetical protein                                        |
| Hypothetical            | HD1296 | conserved hypothetical protein                                        |
| Hypothetical            | HD1520 | conserved hypothetical protein                                        |
| Hypothetical            | HD1561 | hypothetical protein                                                  |
| Hypothetical            | HD1567 | hypothetical protein                                                  |
| Hypothetical            | HD1618 | hypothetical protein                                                  |
| Hypothetical            | HD1632 | conserved hypothetical protein                                        |
| Hypothetical            | HD1655 | conserved hypothetical protein                                        |
| Hypothetical            | HD1698 | hypothetical protein                                                  |
| Outer Membrane Proteins | HD0045 | <i>momp</i> , major outer membrane protein                            |
| Outer Membrane Proteins | HD1078 | <i>ompP1</i> , outer membrane protein P1                              |
| Outer Membrane Proteins | HD1094 | possible outer membrane serine protease                               |
| Regulation              | HD1185 | <i>relA</i> , GTP pyrophosphokinase                                   |
| Regulation              | HD1470 | <i>cpxA</i> , sensor kinase                                           |
| Ribosomal Proteins      | HD1882 | <i>rplA</i> , 50S ribosomal protein L1                                |
| Ribosomal Proteins      | HD1968 | <i>rplN</i> , 50S ribosomal protein L14                               |

**DNA repair: endo- & exonuclease, helicase, ATPase**  
**DNA repair: excises uracil mistakenly added to DNA**  
**DNA repair: mismatch repair**  
**DNA repair: processes Holliday junction intermediates to mature form**  
 DNA repair: repair of endogenous damage  
 DNA repair: repair of mismatches in DNA  
**DNA repair: required for repair of dsDNA breaks**  
**DNA repair: UvrAB complex finds, repairs DNA lesions**  
 helix-stabilizing helicase, important for cell division  
 initiation, elongation of chromosome replication  
**topoisomerase**  
 aerobic respiration: ADP conversion from ATP with proton gradient  
 anaerobic respiration: anaerobic respiratory chain component  
 anaerobic respiration: converts G-3-P to dihydroxyacetone  
 anaerobic respiration: cytochrome synthesis  
 anaerobic respiration: electron transfer  
 anaerobic respiration: electron transfer from glycerol-3-phosphate  
 anaerobic respiration: nitrate reductase, involved in electron transfer

OmpA homolog  
 putative outer membrane protein  
 putative outer membrane protein  
 ppGpp metabolism (generates pppGpp)  
 sensor kinase of 2-component regulatory system

|                         |               |                                                                                 |                                                                                  |
|-------------------------|---------------|---------------------------------------------------------------------------------|----------------------------------------------------------------------------------|
| Ribosomal Proteins      | HD1977        | <i>rpsC</i> , 30S ribosomal protein S3                                          |                                                                                  |
| Secreted Proteins       | HD1156/1505   | <i>lspA1</i> or <i>lspA2</i> , large supernatant protein A (conserved sequence) | antiphagocytic protein                                                           |
| Stress Response         | HD0565        | <i>clpB</i> , ATP-dependant Clp protease chain B                                | ATPase subunit of protease, heat shock inducible                                 |
| Stress Response         | HD0353        | <i>htpX</i> , putative protease                                                 | probable heat shock protein                                                      |
| Toxins                  | HD0903        | <i>cdtB</i> , cytolethal distending toxin protein B                             | part of CDT holotoxin                                                            |
| Transcription           | HD0213        | <i>srnB</i> , ATP-dependent RNA helicase protein                                | helicase, interacts with 23S rRNA                                                |
| Transcription           | HD1876        | <i>rpoC</i> , RNA polymerase beta' subunit                                      | part of RNAP catalytic core                                                      |
| Transcription           | HD1877        | <i>rpoB</i> , RNA polymerase beta subunit                                       | part of RNAP catalytic core                                                      |
| Transcription           | HD0604        | <i>pcnB</i> , polyA polymerase                                                  | polymerase, creates 3' polyA tail, plasmid copy number protein in <i>E. coli</i> |
| Translation             | HD0299        | <i>typA</i> , GTP-binding protein, elongation factor, interacts wih ribosomes   | elongation step: GTPase, mediates EPEC interactions with epithelial cells        |
| <b>Translation</b>      | <b>HD0657</b> | <b><i>fusA</i>, elongation factor G</b>                                         | <b>elongation step: moves protein chain from A to P site of ribosome</b>         |
| <b>Translation</b>      | <b>HD0054</b> | <b><i>tufA</i>, elongation factor tu, EF-Tu</b>                                 | <b>elongation step: promotes aa-tRNA binding to A site of ribosome</b>           |
| Translation             | HD0194        | <i>rne</i> , ribonuclease E                                                     | mRNA degradation: 5S rRNA maturation, mRNA turnover                              |
| Translation             | HD1588        | <i>pnp</i> , polyribonucleotide nucleotidyltransferase                          | mRNA degradation: mRNA degradation, 3' to 5'                                     |
| Translation             | HD1765        | <i>rumA</i> , 23S rRNA (Uracil-5-)-methyltransferase                            | rRNA synthesis: 23S rRNA synthesis/modification                                  |
| <b>Translation</b>      | <b>HD1093</b> | <b><i>cysS</i>, cysteinyl-tRNA synthetase</b>                                   | <b>tRNA synthesis: charges tRNA with cysteine</b>                                |
| Translation             | HD1942        | <i>glyS</i> , glycyl-tRNA synthetase beta subunit                               | tRNA synthesis: charges tRNA with glycine, beta subunit of tetramer              |
| Translation             | HD1318        | <i>lysS</i> , lysyl-tRNA synthetase                                             | tRNA synthesis: charges tRNA with lysine                                         |
| Transport/Uptake        | HD1619        | putative sodium/alanine symporter                                               | nutrient scavanging: alanine transport                                           |
| Transport/Uptake        | HD0768        | <i>manX</i> or <i>ptsL</i> , mannose-specific phosphotransferase IIAB component | nutrient scavanging: carbohydrate transferase in mannose-specific PTS system     |
| Transport/Uptake        | HD1824        | <i>modB</i> , molybdenum ABC transporter, permease protein                      | nutrient scavanging: molybdenum transport                                        |
| Transport/Uptake        | HD1728        | <i>nhaB</i> , Na <sup>+</sup> /H <sup>+</sup> antiporter protein                | nutrient scavanging: sodium transport                                            |
| Transport/Uptake        | HD1669        | <i>satA</i> , putative ABC transporter periplasmic binding protein              | sialic acid transporter                                                          |
| Transport/Uptake        | HD1670        | <i>satB</i> , ABC transporter, permease protein                                 | sialic acid transporter                                                          |
| Transport/Uptake        | HD1528        | <i>exeA</i> , type II secretory protein                                         | Type II ( <i>sec</i> -dependent) secretion pathway component                     |
| Transport/Uptake        | HD1752        | <i>secD</i> , Protein-export membrane protein                                   | Type II ( <i>sec</i> -dependent) secretion pathway component                     |
| <b>Transport/Uptake</b> | <b>HD1788</b> | <b><i>secA</i>, preprotein translocase SecA subunit</b>                         | <b>Type II (<i>sec</i>-dependent) secretion pathway component</b>                |
| <b>Transport/Uptake</b> | <b>HD1886</b> | <b><i>secE</i>, preprotein translocase SecE subunit</b>                         | <b>Type II (<i>sec</i>-dependent) secretion pathway component</b>                |

\* Genes in **bold** have homologs identified during in vivo expression studies in other pathogens.

### Supplementary Data Table S3

| <u>Gene ID</u> | <u>Forward Primer</u>           | <u>Reverse Primer</u>             |
|----------------|---------------------------------|-----------------------------------|
| HD0192         | 5'-ACGGTAACAGACACTGCAGCAAAC-3'  | 5'-CGGCAGCTGATTCTTTCATGCCTT-3'    |
| HD0286         | 5'-CCGGTACAGGGCAATATGGTAATG-3'  | 5'-GCTTGGGTATGTCCCTAATCTGTG-3'    |
| HD0646         | 5'-AGCACGTACTAACCAAACCCGAGA-3'  | 5'-AGCCCTGACAAGCTAGTTCTTCCT-3'    |
| HD0805         | 5'-TTAGCCACAGCAAGTGTCGGTGAT-3'  | 5'-TAGCCAATACCTAACCCGACCTCT-3'    |
| HD1170         | 5'-GGCATTAAACGCTTGCTTCCGCATT-3' | 5'-TCCACGATGACTGCTTTCCTTCCC-3'    |
| HD1280         | 5'-TACGGCAACGGATATTGGTGCAGA-3'  | 5'-TGGCATGCCTGAAATCTGTATCACGAG-3' |
| HD1589         | 5'-AGTGGCCAGCTTCGTTTCTTAAC-3'   | 5'-TCAAAGTAGAGGTCTGCTCGCTCA-3'    |
| HD1629         | 5'-AGAACATACCGATCCTGCTTGGCA-3'  | 5'-TGGTCAATTGGAAATGACACGCCT-3'    |
| HD1655         | 5'-GTGACGACTACGGCGGAATATCAA-3'  | 5'-TGACACCACGTTTGTATTAGGTGA-3'    |
| HD1808         | 5'-TTCACGCGGTGAATTAATGGCAGG-3'  | 5'-TCCGGCGCTTACTGAATGCTTCT-3'     |
| HD1829         | 5'-GTTGAACAAGCCAAGCAAGCGACT-3'  | 5'-TTGCCGCTACATCTGGACGATTTG-3'    |
